# Supplementary material
Source: PubMed Central journal article supplement (PMC6187122)
Supplement: pnas.1808247115.sapp.pdf [file pnas.1808247115.sapp.pdf]

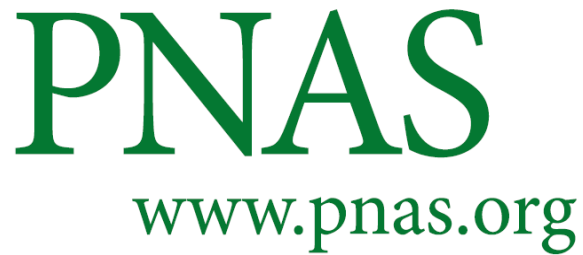

## Supporting Information for

### **Activation of autophagy rescues synaptic and cognitive deficits in Fragile X mice**

Jingqi Yan, Morgan W. Porch, Brenda Court-Vazquez, Michael V.L. Bennett, and R. Suzanne Zukin

Corresponding author:

Michael V.L. Bennett

[michael.bennett@einstein.yu.edu](mailto:michael.bennett@einstein.yu.edu)

R. Suzanne Zukin

[suzanne.zukin@einstein.yu.edu](mailto:suzanne.zukin@einstein.yu.edu)

This PDF file includes:

Figs. S1 to S3

Supplemental Tables 1 to 10

**Fig. S1. Validation of Raptor and Atg7 shRNA viruses in mouse brain.**

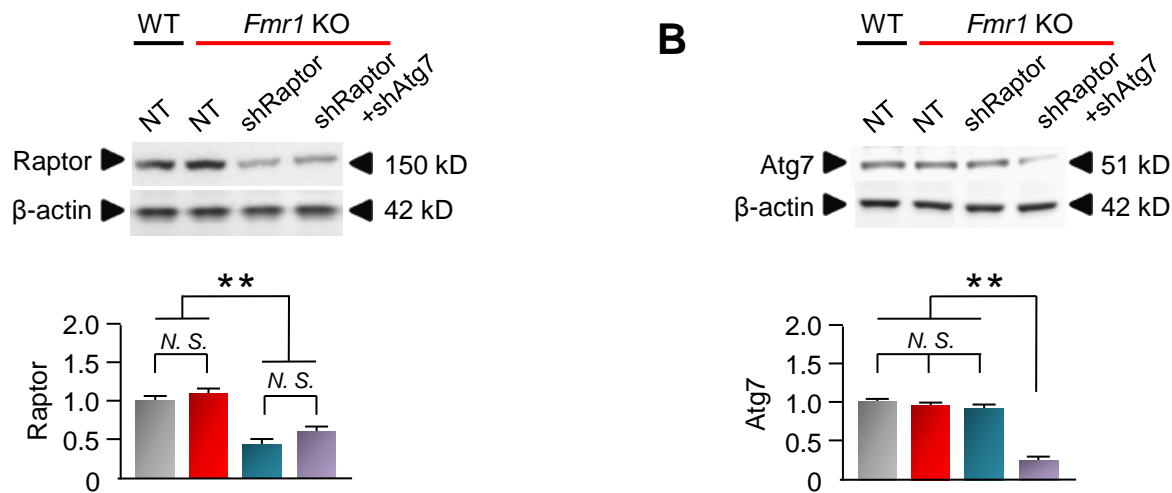

**Fig. S1. Validation of Raptor and Atg7 shRNA viruses in WT and *Fmr1* KO mouse brain.** *Fmr1* KO mice (male, 5-week-old) were bilaterally injected in the hippocampal CA1 with lentiviruses expressing GFP with **NT** shRNA, **shRaptor** alone, or shRaptor together with shRNA to Atg7 (**shRaptor + shAtg7**). Age-matched WT male mice expressing **NT** shRNA were used as control. One week after injection, we assessed the ability of shRaptor and shAtg7 to suppress Raptor and Atg7 abundance in whole-cell lysates of CA1 by Western blot analysis. Upper, representative Western blot. Lower, summary data show Raptor (**A**) and ATG7 (**B**) abundance in CA1 of mouse brains (normalized to the value for WT mice expressing NT shRNA). \*\*  $p < 0.01$ . Statistics were calculated by two-way ANOVA with Tukey's test.  $n = 4$  WT mice in each group.

**Fig. S2. Autophagic degradation of PSD-95 in neurons of WT and FXS mice.**

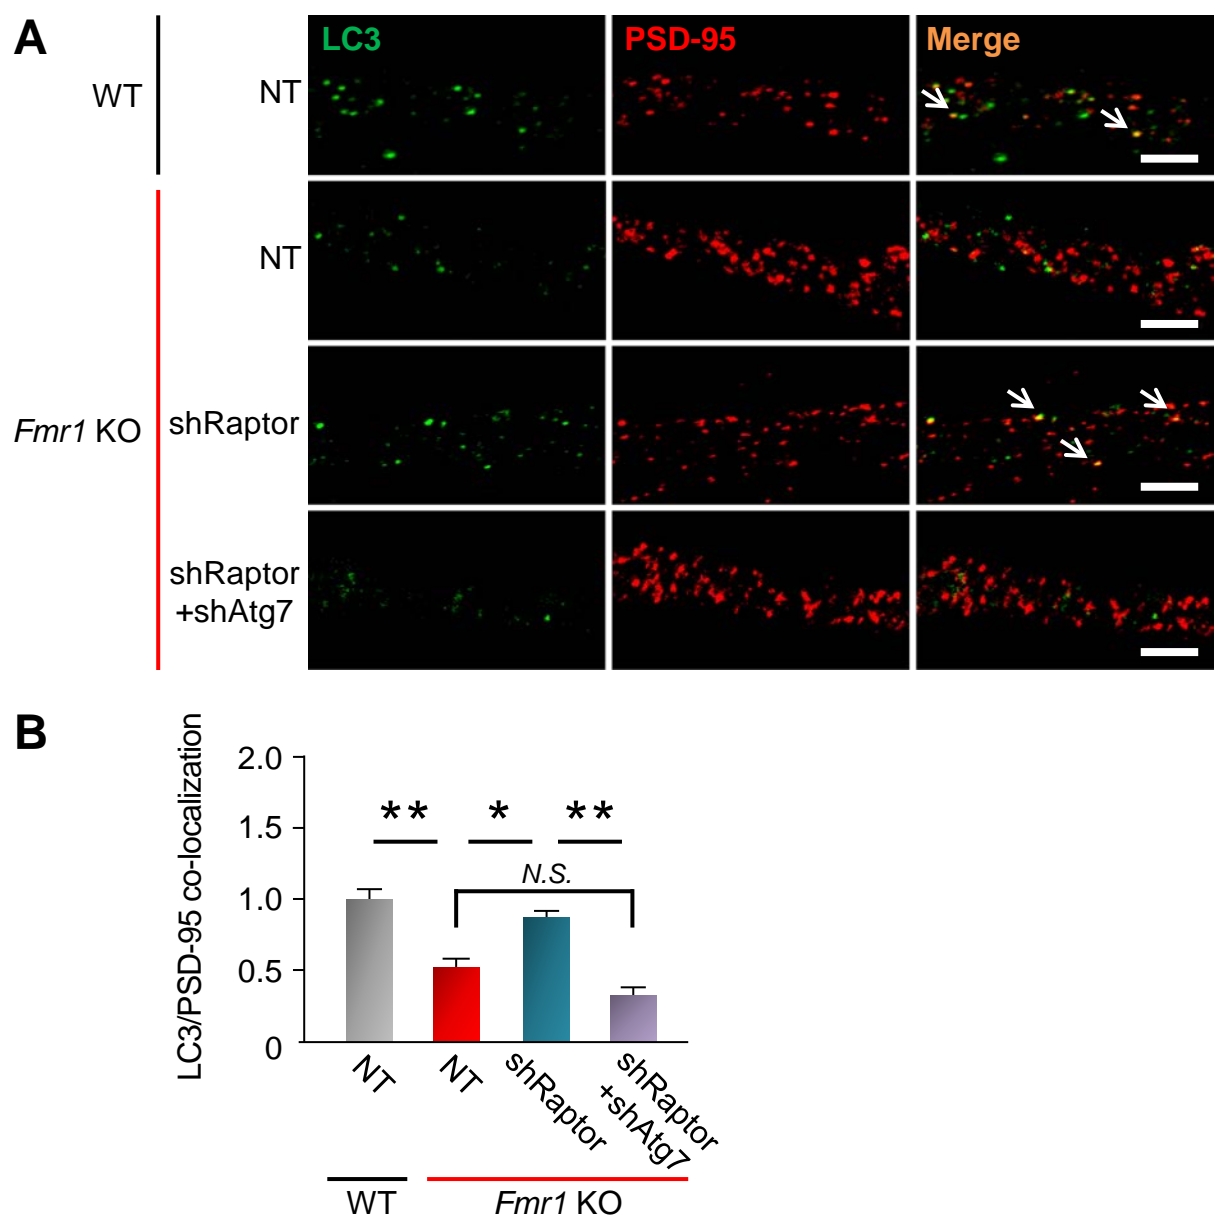

**Fig. S2. Autophagy promotes degradation of PSD-95 in neurons of Fragile X mice.** Primary cultures of hippocampal neurons from *Fmr1* KO mice were transfected with lentivirus expressing NT shRNA (negative control), shRaptor, or shRaptor + shAtg7. Values for KO neurons were normalized to the corresponding values for WT neurons expressing NT shRNA. 72 h after transfection, localization of PSD-95 to LC3(+) autophagosomes was determined by immunolabeling. **(A)** Representative images of PSD-95 and LC3 immunolabeling. Scale bar, 5  $\mu$ m; **(B)** Summary data showing co-localization of PSD-95 puncta with LC3(+) puncta. ). \*  $p < 0.05$ , \*\*  $p < 0.01$ , N.S.: no significant difference. Statistics were calculated by two-way ANOVA with Tukey's test;  $n = 4$  independent experiments with separate batches of neurons cultured from different litters and a minimum of 50 cells per group were analyzed. Values reflect mean  $\pm$  s.e.m.

**Fig. S3. Autophagic degradation of Arc in WT and KO neurons.**

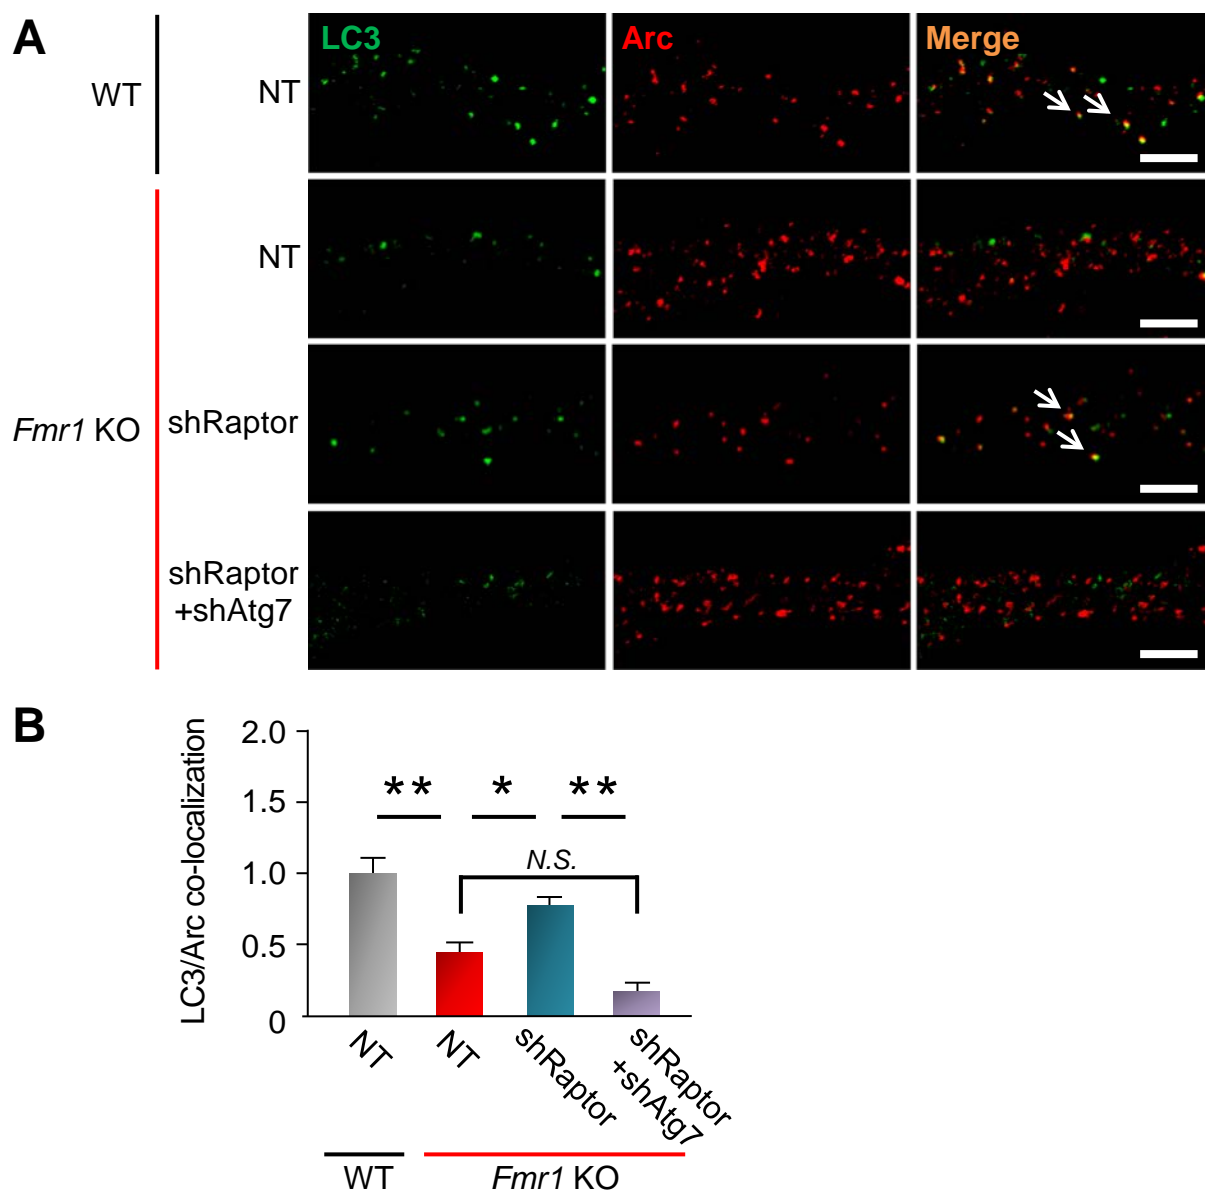

**Fig. S3. Autophagy promotes degradation of Arc in neurons of Fragile X mice.** Primary cultures of hippocampal neurons from *Fmr1* KO mice were transfected with lentivirus expressing NT shRNA (negative control), shRaptor, or shRaptor + shAtg7. 72 h after transfection, localization of Arc to LC3(+)-autophagosomes was examined by immunolabeling. **(A)** Representative images of Arc and LC3 immunolabeling. Scale bar, 5  $\mu$ m; **(B)** Summary data showing co-localization of Arc puncta with LC3(+) puncta. Values for KO neurons were normalized to the corresponding values for WT neurons expressing NT shRNA. \*  $p < 0.05$ , \*\*  $p < 0.01$ , N.S.: no significant difference. Statistics were calculated by two-way ANOVA with Tukey's test;  $n = 4$  independent experiments with separate batches of neurons cultured from different litters and a minimum of 50 cells per group were analyzed. Values reflect mean  $\pm$  s.e.m.

**Supplemental Table 1.** Summary of statistics for **Figure 2**

| <b>Figure</b> | <b>N</b>                                                     | <b>Mean <math>\pm</math> SEM</b>   | <b>p value</b>      | <b>Statistical Test</b>                        |
|---------------|--------------------------------------------------------------|------------------------------------|---------------------|------------------------------------------------|
| <b>B</b>      | WT = 5 cultures<br>KO = 5 cultures                           | 1.00 $\pm$ 0.08<br>1.18 $\pm$ 0.12 | $p=0.24214$         | Two-tailed unpaired <i>t</i> test for WT vs KO |
| <b>C</b>      | WT = 5 cultures<br>KO = 5 cultures                           | 1.00 $\pm$ 0.08<br>0.43 $\pm$ 0.12 | <b>**</b> , 0.004   |                                                |
| <b>D</b>      | WT = 5 cultures<br>KO = 5 cultures                           | 1.00 $\pm$ 0.08<br>0.36 $\pm$ 0.05 | <b>**</b> , 0.00145 |                                                |
| <b>F</b>      | WT = 5 cultures (54 neurons)<br>KO = 5 cultures (60 neurons) | 1.00 $\pm$ 0.09<br>0.46 $\pm$ 0.10 | <b>**</b> , 0.007   |                                                |
| <b>H</b>      | WT = 5 cultures (53 neurons)<br>KO = 5 cultures (50neurons)  | 1.00 $\pm$ 0.13<br>1.51 $\pm$ 0.15 | <b>*</b> , 0.03409  |                                                |
| <b>J</b>      | WT = 4 mice<br>KO =4 mice                                    | 1.00 $\pm$ 0.17<br>2.65 $\pm$ 0.35 | <b>**</b> , 0.00578 |                                                |

**Supplemental Table 2.** Summary of statistics for **Figure 3**

| <b>Figure</b>                        | <b>N</b>                                                     | <b>Mean <math>\pm</math> SEM</b>   | <b>p value</b>         | <b>Statistical Test</b>                                 |
|--------------------------------------|--------------------------------------------------------------|------------------------------------|------------------------|---------------------------------------------------------|
| <b>A</b><br><b>(p-mTOR)</b>          | WT = 4 cultures<br>KO = 4 cultures                           | 1.00 $\pm$ 0.17<br>2.46 $\pm$ 0.15 | <b>**</b> , 0.0007     | Two-tailed<br>unpaired <i>t</i><br>test for WT vs<br>KO |
| <b>A</b><br><b>(Total mTOR)</b>      | WT = 4 cultures<br>KO = 4 cultures                           | 1.00 $\pm$ 0.05<br>1.09 $\pm$ 0.05 | <i>N.S.</i><br>0.25281 |                                                         |
| <b>B</b><br><b>(p-ULK-1)</b>         | WT = 4 cultures<br>KO = 4 cultures                           | 1.00 $\pm$ 0.14<br>2.16 $\pm$ 0.18 | <b>**</b> , 0.0026     |                                                         |
| <b>B</b><br><b>( Total ULK-1)</b>    | WT = 4 cultures<br>KO = 4 cultures                           | 1.00 $\pm$ 0.09<br>1.10 $\pm$ 0.06 | <i>N.S.</i><br>0.43538 |                                                         |
| <b>C</b><br><b>(p-ULK-1)</b>         | WT = 4 cultures<br>KO = 4 cultures                           | 1.00 $\pm$ 0.11<br>0.51 $\pm$ 0.09 | <b>*</b> , 0.01491     |                                                         |
| <b>C</b><br><b>( Total ULK-1)</b>    | WT = 4 cultures<br>KO = 4 cultures                           | 1.00 $\pm$ 0.05<br>1.18 $\pm$ 0.06 | <i>N.S.</i><br>0.0765  |                                                         |
| <b>D</b><br><b>(p-Beclin-1)</b>      | WT = 4 cultures<br>KO = 4 cultures                           | 1.00 $\pm$ 0.10<br>0.39 $\pm$ 0.11 | <b>*</b> , 0.02987     |                                                         |
| <b>D</b><br><b>( Total Beclin-1)</b> | WT = 4 cultures<br>KO = 4 cultures                           | 1.00 $\pm$ 0.05<br>1.07 $\pm$ 0.07 | <i>N.S.</i><br>0.44426 |                                                         |
| <b>E (Total)</b>                     | WT = 5 mice<br>KO = 5 mice                                   | 1.00 $\pm$ 0.08<br>0.96 $\pm$ 0.06 | <i>N. S.</i> ,0.71384  |                                                         |
| <b>E (Lysosomal)</b>                 | WT = 5 mice<br>KO = 5 mice                                   | 1.00 $\pm$ 0.16<br>2.37 $\pm$ 0.33 | <b>**</b> , 0.00612    |                                                         |
| <b>F (Lysosomal)</b>                 | WT = 4 cultures (32 neurons)<br>KO = 4 cultures (30 neurons) | 1.00 $\pm$ 0.14<br>2.10 $\pm$ 0.32 | <b>*</b> , 0.02122     |                                                         |
| <b>F(Total)</b>                      | WT = 4 cultures<br>KO = 4 cultures                           | 1.00 $\pm$ 0.07<br>0.97 $\pm$ 0.11 | <i>N. S.</i> ,0.81132  |                                                         |

**Supplemental Table 3.** Summary of statistics for **Figure 4**

| Figure             | N                                            | Mean ± SEM                 | p value                                  | Statistical Test                     |
|--------------------|----------------------------------------------|----------------------------|------------------------------------------|--------------------------------------|
| A                  | NT shRNA = 4 WT mice<br>shRatpor = 5 WT mice | 1.00 ± 0.08<br>0.43 ± 0.05 | ** , 0.0004                              | Two-way ANOVA with Tukey's post-test |
| B                  | WT + NT shRNA = 4 cultures                   | 1.00 ± 0.07                | WT + NT vs. KO + NT **, 0.00372          |                                      |
|                    | KO + NT shRNA = 4 cultures                   | 1.78 ± 0.16                | KO + NT vs. KO + shRaptor *, 0.01355     |                                      |
|                    | KO + shRaptor = 4 cultures                   | 1.15 ± 0.12                | WT + NT vs. KO + shRaptor N. S., 0.66532 |                                      |
| C                  | WT + NT shRNA = 4 cultures                   | 1.00 ± 0.08                | WT + NT vs. KO + NT **, 0.0006           |                                      |
|                    | KO + NT shRNA = 4 cultures                   | 1.95 ± 0.18                | KO + NT vs. KO + shRaptor *, 0.01366     |                                      |
|                    | KO + shRaptor = 4 cultures                   | 1.36 ± 0.09                | WT + NT vs. KO + shRaptor N. S., 0.12451 |                                      |
| D (LC3-II)         | WT + NT shRNA = 4 cultures                   | 1.00 ± 0.05                | WT + NT vs. KO + NT **, 0.0008           |                                      |
|                    | KO + NT shRNA = 4 cultures                   | 0.52 ± 0.06                | KO + NT vs. KO + shRaptor **, 0.0055     |                                      |
|                    | KO + shRaptor = 4 cultures                   | 0.88 ± 0.06                | WT + NT vs. KO + shRaptor N. S., 0.37854 |                                      |
| D (LC3-II/I ratio) | WT + NT shRNA = 4 cultures                   | 1.00 ± 0.08                | WT + NT vs. KO + NT **, 0.00417          |                                      |
|                    | KO + NT shRNA = 4 cultures                   | 0.52 ± 0.05                | KO + NT vs. KO + shRaptor **, 0.00499    |                                      |
|                    | KO + shRaptor = 4 cultures                   | 0.99 ± 0.10                | WT + NT vs. KO + shRaptor N. S., 0.99142 |                                      |
| F                  | KO + NT shRNA = 4 cultures (60 neurons)      | 1.00 ± 0.16                | * , 0.01113                              |                                      |
|                    | KO + shRaptor = 4 cultures (50 neurons)      | 2.14 ± 0.27                |                                          |                                      |

**Supplemental Table 4.** Summary of statistics for **Figure 5**

| Figure                            | N                                                                                                                                                                       | Mean $\pm$ SEM                                                                       | p value                                                                                                                                               | Statistical Test                     |
|-----------------------------------|-------------------------------------------------------------------------------------------------------------------------------------------------------------------------|--------------------------------------------------------------------------------------|-------------------------------------------------------------------------------------------------------------------------------------------------------|--------------------------------------|
| <b>B</b><br>(Spine density)       | WT + NT shRNA = 6 mice (30 neurons)<br>KO + NT shRNA = 6 mice (30 neurons)<br><br>KO + shRaptor = 6 mice (30 neurons)<br><br>KO+ shRaptor +shAtg7 = 6 mice (30 neurons) | 9.50 $\pm$ 0.61<br>14.90 $\pm$ 0.33<br><br>10.57 $\pm$ 0.73<br><br>13.77 $\pm$ 0.31  | WT + NT vs. KO + NT<br>**, $p < 0.0001$<br><br>KO + NT vs. KO + shRaptor<br>**, 0.0006<br><br>KO + shRaptor vs. KO + shRaptor + shAtg7<br>**, 0.00191 | Two-way ANOVA with Tukey's post-test |
| <b>C</b><br>(%Stubby/Mushroom)    | WT + NT shRNA = 6 mice (30 neurons)<br>KO + NT shRNA = 6 mice (30 neurons)<br><br>KO + shRaptor = 6 mice (30 neurons)<br><br>KO+ shRaptor +shAtg7 = 6 mice (30 neurons) | 33.91 $\pm$ 3.76<br>19.50 $\pm$ 2.06<br><br>34.52 $\pm$ 3.15<br><br>21.75 $\pm$ 2.49 | WT + NT vs. KO + NT<br>**, 0.00723<br><br>KO + NT vs. KO + shRaptor<br>**, 0.00257<br><br>KO + shRaptor vs. KO + shRaptor + shAtg7<br>**, 0.00992     |                                      |
| <b>C</b><br>(%Thin/Filopodia)     | WT + NT shRNA = 6 mice (30 neurons)<br>KO + NT shRNA = 6 mice (30 neurons)<br><br>KO + shRaptor = 6 mice (30 neurons)<br><br>KO+ shRaptor +shAtg7 = 6 mice (30 neurons) | 8.67 $\pm$ 0.91<br>18.54 $\pm$ 2.48<br><br>10.84 $\pm$ 1.01<br><br>16.14 $\pm$ 1.80  | WT + NT vs. KO + NT<br>**, 0.0039<br><br>KO + NT vs. KO + shRaptor:<br>*, 0.01661<br><br>KO + shRaptor vs. KO + shRaptor + shAtg7:<br>*, 0.02784      |                                      |
| <b>D</b><br>(head width, $\mu$ m) | WT + NT shRNA = 6 mice (27 neurons)<br>KO + NT shRNA = 6 mice (32 neurons)<br><br>KO + shRaptor = 6 mice (27 neurons)<br><br>KO+ shRaptor +shAtg7 = 6 mice (28 neurons) | 0.51 $\pm$ 0.04<br>0.32 $\pm$ 0.03<br><br>0.45 $\pm$ 0.04<br><br>0.33 $\pm$ 0.03     | WT + NT vs. KO + NT:<br>**, 0.00022<br><br>KO + NT vs. KO + shRaptor<br>**, 0.00655<br><br>KO + shRaptor vs. KO + shRaptor + shAtg7<br>**, 0.00868    |                                      |

**Supplemental Table 5.** Summary of statistics for **Figure 6**

| <b>Figure</b>                                | <b>N</b>                                                     | <b>Mean ± SEM</b> | <b>p value</b>                                               | <b>Statistical Test</b>              |
|----------------------------------------------|--------------------------------------------------------------|-------------------|--------------------------------------------------------------|--------------------------------------|
| <b>B</b><br>(%, fESP in last 10 min)         | WT + NT shRNA = 6 mice                                       | 87.19 ± 3.34      | WT + NT vs. KO + NT<br>*, 0.0401                             | Two-way ANOVA with Tukey's post-test |
|                                              | KO + NT shRNA = 6 mice                                       | 75.05 ± 3.24      |                                                              |                                      |
|                                              | KO + shRaptor = 6 mice                                       | 93.17 ± 3.04      | KO + NT vs. KO + shRaptor<br>**, 0.00286                     |                                      |
|                                              | KO+ shRaptor +shAtg7 = 6 mice<br>(2-3 slices for each mouse) | 83.05 ± 2.53      | KO + shRaptor vs. KO + shRaptor + shAtg7<br>**, 0.00681      |                                      |
| <b>C</b><br>(Interaction time with novel)    | WT + NT shRNA = 10 mice                                      | 73.50 ± 3.21      | WT + NT novel vs. WT + NT familiar<br>**, 0.0005             |                                      |
|                                              | KO + NT shRNA = 9 mice                                       | 76.11 ± 3.34      |                                                              |                                      |
|                                              | KO + shRaptor = 8 mice                                       | 85.63 ± 4.13      | KO + shRaptor novel vs. KO + shRaptor familiar<br>*, 0.04339 |                                      |
|                                              | KO+ shRaptor +shAtg7 = 8 mice                                | 72.50 ± 5.59      |                                                              |                                      |
| <b>C</b><br>(Interaction time with familiar) | WT + NT shRNA = 10 mice                                      | 47.93± 4.31       | WT + NT novel vs. WT + NT familiar<br>**, 0.0005             |                                      |
|                                              | KO + NT shRNA = 9 mice                                       | 77.78 ± 2.48      |                                                              |                                      |
|                                              | KO + shRaptor = 8 mice                                       | 66.00 ± 5.59      | KO + shRaptor novel vs. KO + shRaptor familiar<br>*, 0.04339 |                                      |
|                                              | KO+ shRaptor +shAtg7 = 8 mice                                | 74.52 ± 5.61      |                                                              |                                      |
| <b>D</b><br>(Preference to Novel)            | WT + NT shRNA = 10 mice                                      | 0.621 ± 0.019     | WT + NT vs. KO + NT:<br>**, $p < 0.0001$                     |                                      |
|                                              | KO + NT shRNA = 9 mice                                       | 0.495 ± 0.006     |                                                              |                                      |
|                                              | KO + shRaptor = 8 mice                                       | 0.568 ± 0.015     | KO + NT vs. KO + shRaptor<br>*, 0.02261                      |                                      |
|                                              | KO+ shRaptor +shAtg7 = 8 mice                                | 0.493 ± 0.014     | KO + shRaptor vs. KO + shRaptor + shAtg7<br>*, 0.02808       |                                      |

**Supplemental Table 6.** Summary of statistics for **Figure 7**

| Figure                              | N                                                            | Mean $\pm$ SEM                     | p value          | Statistical Test                               |
|-------------------------------------|--------------------------------------------------------------|------------------------------------|------------------|------------------------------------------------|
| <b>B</b><br>(Ubiquitinated)         | WT = 4 cultures (50 neurons)<br>KO = 4 cultures (50 neurons) | 1.00 $\pm$ 0.15<br>1.92 $\pm$ 0.22 | *, 0.01429       | Two-tailed unpaired <i>t</i> test for WT vs KO |
| <b>C</b><br>(Co-localized with p62) | WT = 4 cultures (53 neurons)<br>KO = 4 cultures (57 neurons) | 1.00 $\pm$ 0.17<br>3.52 $\pm$ 0.33 | **, 0.0005       |                                                |
| <b>D</b><br>(PSD-95, Input)         | WT = 4 cultures<br>KO = 4 cultures                           | 1.00 $\pm$ 0.04<br>2.75 $\pm$ 0.12 | **, $p < 0.0001$ |                                                |
| <b>D</b><br>(PSD-95, Co-lp)         | WT = 4 cultures<br>KO = 4 cultures                           | 1.00 $\pm$ 0.08<br>2.02 $\pm$ 0.12 | **, 0.0004       |                                                |
| <b>E</b><br>(Arc, Input)            | WT = 4 cultures<br>KO = 4 cultures                           | 1.00 $\pm$ 0.06<br>2.03 $\pm$ 0.11 | **, 0.0005       |                                                |
| <b>E</b><br>(Arc, Co-lp)            | WT = 4 cultures<br>KO = 4 cultures                           | 1.00 $\pm$ 0.07<br>2.34 $\pm$ 0.08 | **, 0.0001       |                                                |

**Supplemental Table 7.** Summary of statistics for **Figure 8**

| Figure                             | N                                                                                                                            | Mean $\pm$ SEM                                                           | p value                                                                                                                                                                                        | Statistical Test                     |
|------------------------------------|------------------------------------------------------------------------------------------------------------------------------|--------------------------------------------------------------------------|------------------------------------------------------------------------------------------------------------------------------------------------------------------------------------------------|--------------------------------------|
| <b>A</b><br><b>(PSD-95, Input)</b> | WT + Veh = 4 cultures<br>WT + Lac= 4 cultures<br>WT + 3-MA= 4 cultures<br>WT + lyso inhibitor = 4 cultures                   | 1.00 $\pm$ 0.05<br>2.26 $\pm$ 0.19<br>1.74 $\pm$ 0.11<br>2.45 $\pm$ 0.16 | Veh vs. Lac: **, 0.0001<br>Veh vs. 3-MA: **, 0.00942<br>Veh vs. lyso inhibitor: **, 0.00003                                                                                                    | Two-way ANOVA with Tukey's post-test |
| <b>A</b><br><b>(PSD-95, Co-lp)</b> | WT + Veh = 4 cultures<br>WT + Lac= 4 cultures<br>WT + 3-MA= 4 cultures<br>WT + lyso inhibitor = 4 cultures                   | 1.00 $\pm$ 0.08<br>2.69 $\pm$ 0.14<br>1.71 $\pm$ 0.07<br>2.16 $\pm$ 0.09 | Veh vs. Lac: **, 0.0003<br>Veh vs. 3-MA: **, 0.00142<br>Veh vs. lyso inhibitor: **, 0.00002                                                                                                    |                                      |
| <b>B</b><br><b>(Arc, Input)</b>    | WT + Veh = 4 cultures<br>WT + Lac= 4 cultures<br>WT + 3-MA= 4 cultures<br>WT + lyso inhibitor = 4 cultures                   | 1.00 $\pm$ 0.07<br>2.06 $\pm$ 0.11<br>1.94 $\pm$ 0.08<br>2.73 $\pm$ 0.12 | Veh vs. Lac: **, $p < 0.0001$<br>Veh vs. 3-MA: **, 0.0001<br>Veh vs. lyso inhibitor: **, $p < 0.00001$                                                                                         |                                      |
| <b>B</b><br><b>(Arc, Co-lp)</b>    | WT + Veh = 4 cultures<br>WT + Lac= 4 cultures<br>WT + 3-MA= 4 cultures<br>WT + lyso inhibitor = 4 cultures                   | 1.00 $\pm$ 0.06<br>1.52 $\pm$ 0.08<br>1.72 $\pm$ 0.10<br>1.61 $\pm$ 0.08 | Veh vs. Lac: **, 0.00383<br>Veh vs. 3-MA: **, 0.0003<br>Veh vs. lyso inhibitor: **, 0.0011                                                                                                     |                                      |
| <b>C</b>                           | WT + NT shRNA = 4 cultures<br>KO + NT shRNA = 4 cultures<br>KO + shRaptor = 4 cultures<br>KO+ shRaptor + shAtg7 = 4 cultures | 1.00 $\pm$ 0.12<br>3.27 $\pm$ 0.22<br>1.57 $\pm$ 0.14<br>2.92 $\pm$ 0.16 | WT + NT vs. KO + NT<br>**, $p < 0.00001$<br>KO + NT vs. KO + shRaptor<br>**, 0.00004<br>KO + shRaptor vs. KO + shRaptor + shAtg7<br>**, 0.0004<br>WT + NT vs. KO + shRaptor<br>N. S. , 0.15983 |                                      |
| <b>D</b>                           | WT + NT shRNA = 4 cultures<br>KO + NT shRNA = 4 cultures<br>KO + shRaptor = 4 cultures<br>KO+ shRaptor + shAtg7 = 4 cultures | 1.00 $\pm$ 0.06<br>1.96 $\pm$ 0.20<br>0.85 $\pm$ 0.08<br>1.43 $\pm$ 0.09 | WT + NT vs. KO + NT<br>**, 0.0006<br>KO + NT vs. KO + shRaptor<br>**, 0.0002<br>KO + shRaptor vs. KO + shRaptor + shAtg7<br>*, 0.02925<br>WT + NT vs. KO + shRaptor<br>N. S. , 0.84261         |                                      |

**Supplemental Table 8.** Summary of statistics for **Fig. S1**.

| Figure                | N                                 | Mean $\pm$ SEM  | p value                                                       | Statistical Test                     |
|-----------------------|-----------------------------------|-----------------|---------------------------------------------------------------|--------------------------------------|
| <b>A<br/>(Raptor)</b> | WT + NT shRNA = 4 cultures        | 1.00 $\pm$ 0.06 | WT + NT vs. KO + NT<br>N. S., 0.70715                         | Two-way ANOVA with Tukey's post-test |
|                       | KO + NT shRNA =4 cultures         | 1.10 $\pm$ 0.06 | KO + NT vs. KO + shRaptor<br>**, 0.00004                      |                                      |
|                       | KO + shRaptor = 4 cultures        | 0.42 $\pm$ 0.08 | KO + shRaptor vs. KO + shRaptor + shAtg7<br>N. S., 0.80533    |                                      |
|                       | KO+ shRaptor +shAtg7 =4 cultures  | 0.50 $\pm$ 0.06 | WT + NT vs. KO + shRaptor<br>**, 0.0002                       |                                      |
| <b>B<br/>(Atg7)</b>   | WT + NT shRNA = 4 cultures        | 1.00 $\pm$ 0.04 | WT + NT vs. KO + NT<br>N. S., 0.90262                         |                                      |
|                       | KO + NT shRNA = 4 cultures        | 0.95 $\pm$ 0.05 | KO + NT vs. KO + shRaptor<br>N. S., 0.9699                    |                                      |
|                       | KO + shRaptor = 4 cultures        | 0.92 $\pm$ 0.05 | KO + shRaptor vs. KO + shRaptor + shAtg7<br>**, $p < 0.00001$ |                                      |
|                       | KO+ shRaptor +shAtg7 = 4 cultures | 0.24 $\pm$ 0.05 | WT + NT vs. KO + shRaptor<br>N. S., 0.9699                    |                                      |
|                       |                                   |                 | WT + NT vs. KO + shRaptor + shAtg7<br>**, $p < 0.00001$       |                                      |

**Supplemental Table 9.** Summary of statistics for **Fig. S2**.

| Figure   | N                                                   | Mean $\pm$ SEM  | p value                                                 | Statistical Test                     |
|----------|-----------------------------------------------------|-----------------|---------------------------------------------------------|--------------------------------------|
| <b>B</b> | WT + NT shRNA = 4 cultures<br>(63 neurons)          | 1.00 $\pm$ 0.08 | WT + NT vs. KO + NT<br>**, 0.00281                      | Two-way ANOVA with Tukey's post-test |
|          | KO + NT shRNA = 4 cultures<br>(52 neurons)          | 0.52 $\pm$ 0.08 | KO + NT vs. KO + shRaptor<br>*, 0.02874                 |                                      |
|          | KO + shRaptor = 4 cultures<br>(54 neurons)          | 0.86 $\pm$ 0.05 | KO + shRaptor vs. KO + shRaptor + shAtg7<br>**, 0.00109 |                                      |
|          | KO + shRaptor + shAtg7 = 4 cultures<br>(50 neurons) | 0.32 $\pm$ 0.07 | KO + NT vs. KO + shRaptor + shAtg7<br>N. S., 0.27085    |                                      |

**Supplemental Table 10.** Summary of statistics for **Fig. S3**.

| Figure   | N                                                   | Mean $\pm$ SEM  | p value                                                | Statistical Test                     |
|----------|-----------------------------------------------------|-----------------|--------------------------------------------------------|--------------------------------------|
| <b>B</b> | WT + NT shRNA = 4 cultures<br>(54 neurons)          | 1.00 $\pm$ 0.12 | WT + NT vs. KO + NT<br>**, 0.00162                     | Two-way ANOVA with Tukey's post-test |
|          | KO + NT shRNA = 4 cultures<br>(50 neurons)          | 0.44 $\pm$ 0.08 | KO + NT vs. KO + shRaptor<br>*, 0.04791                |                                      |
|          | KO + shRaptor = 4 cultures<br>(50 neurons)          | 0.78 $\pm$ 0.05 | KO + shRaptor vs. KO + shRaptor + shAtg7<br>**, 0.0009 |                                      |
|          | KO + shRaptor + shAtg7 = 4 cultures<br>(52 neurons) | 0.18 $\pm$ 0.05 | KO + NT vs. KO + shRaptor + shAtg7<br>N. S., 0.16783   |                                      |
